# Supplementary material for: Inter-subspecies diversity of maize to drought stress with physio-biochemical, enzymatic and molecular responses
Source: PeerJ. 2024 Aug 22;12:e17931. doi: 10.7717/peerj.17931 (PMC11345000; doi:10.7717/peerj.17931)
Supplement: Supplemental Information 1 [file peerj-12-17931-s001.docx]

Suppl. Table 1. Mean squares obtained from variance analysis of examined parameters for the effect of in maize subspecies in drought stress.

| Source | DF | RWC | LOT | PRO | SPR | MD% | MDI | MDA | H2O2 | SOD | APX | CAT | HSP70 | HSP90 |
| --- | --- | --- | --- | --- | --- | --- | --- | --- | --- | --- | --- | --- | --- | --- |
| Maize subspecies (M) | 2 | 231.4** | 201.11** | 249.68** | 66186** | 96.77* | 42.92* | 22.79** | 1507.67** | 0.02** | 0.46** | 0.05** | 3.44** | 134.30** |
| Drought stress (D) | 2 | 2844.0** | 2273.11** | 173.33** | 901878** | 312.64** | 199.55** | 76.81** | 341.75** | 0.06** | 0.43** | 0.40** | 0.11ns | 83.28** |
| M × D | 4 | 676.5** | 550.46** | 323.84** | 25507** | 52.33ns | 34.69ns | 12.21** | 11.74* | 0.01ns | 0.10** | 0.02** | 1.02ns | 97.86** |
| Error | 18 | 10.8 | 13.71 | 0.93 | 2063 | 23.13 | 14.88 | 2.71 | 4.28 | 0.003 | 0.004 | 0.001 | 0.54 | 12.46 |

* = p ≤ 0.05, ** = p ≤ 0.001, ns = not significant, RWC: relative water content, LOT: loss of turgidity, SPR: soluble protein content, MDA: malondealtehit content, H2O2: hydrogen peroxide content, SOD: superoxide dismutase activity, APX: ascorbate peroxidase activity, CAT: catalase activity, HSP70: HSP70 gene expression level, HSP90: HSP90 gene expression level
