# Supplementary material for: Inter-subspecies diversity of maize to drought stress with physio-biochemical, enzymatic and molecular responses
Source: PeerJ. 2024 Aug 22;12:e17931. doi: 10.7717/peerj.17931 (PMC11345000; doi:10.7717/peerj.17931)
Supplement: Supplemental Information 2 [file peerj-12-17931-s002.xlsx]

## Sheet: SPSS
Maize subspecies	Drought stress	Replication	RWC	LOT	PRO	SPR	%MD	MDI	MDA	H2O2	SOD	APX	CAT	HSP70	HSP90
Dent maize (D)	Control (%80)	1	74.701	21.8949	11.8156	1694.97	-3.74258	80.7082	11.1034	8.61179	0.0564903	0.467275	0.260502	1.08526	0.868599
Dent maize (D)	Control (%80)	2	71.2896	26.496	12.3836	1686.63	4.98377	73.9194	7.30375	9.02384	0.0808154	0.498209	0.200261	0.966962	0.732304
Dent maize (D)	Control (%80)	3	71.3108	24.6721	12.1953	1710.68	-1.24119	78.7622	9.20907	15.7726	0.0572524	0.371101	0.281909	0.952922	1.57213
Dent maize (D)	Moderate (%50)	1	70.3833	25.0885	14.4828	1258.83	1.53917	76.5992	11.567	21.6474	0.154545	0.466135	0.494719	1.49094	1.14387
Dent maize (D)	Moderate (%50)	2	67.7128	27.6538	13.2091	1234.15	-0.847756	78.4561	11.1806	22.8526	0.134941	0.536657	0.518768	1.39222	0.882157
Dent maize (D)	Moderate (%50)	3	71.3516	24.1708	12.8144	1204.29	2.9155	75.5285	11.0382	20.87	0.159371	0.58258	0.571246	1.6641	1.26299
Dent maize (D)	Severe (%30)	1	63.2231	32.0374	36.2583	1112.87	7.32455	72.0984	14.0138	26.0207	0.153836	0.624889	0.580076	1.77556	1.16721
Dent maize (D)	Severe (%30)	2	62.7783	31.8544	36.752	1089.32	11.7521	68.6538	11.0382	27.5115	0.163032	0.541849	0.561917	1.02116	0.00426122
Dent maize (D)	Severe (%30)	3	59.4646	36.3559	34.9685	1128.59	13.5551	67.2512	13.1102	24.7751	0.142035	0.710461	0.560636	1.13234	0.950692
Popcorn (P)	Control (%80)	1	75.4891	20.7333	13.7276	1841.42	-0.686172	80.291	10.6085	37.7932	0.117985	0.325948	0.107161	0.508796	0.99579
Popcorn (P)	Control (%80)	2	81.6686	15.5327	15.0004	1724.48	-6.54364	84.962	5.3825	36.3245	0.107442	0.321071	0.159752	0.76983	0.408643
Popcorn (P)	Control (%80)	3	75.2883	20.9899	13.8194	1661.78	7.22982	73.9785	7.67398	38.653	0.103022	0.402876	0.118396	2.55306	2.45747
Popcorn (P)	Moderate (%50)	1	53.0562	41.7003	18.5012	1517.83	1.76878	78.3333	15.4384	45.284	0.234984	0.440863	0.18764	1.13007	2.90548
Popcorn (P)	Moderate (%50)	2	49.8272	45.2015	16.3575	1523.9	0.58926	79.2739	13.1685	48.3117	0.151816	0.392829	0.202636	2.52732	2.62593
Popcorn (P)	Moderate (%50)	3	48.3072	46.3723	18.8677	1560.91	2.42339	77.8113	15.2444	47.7091	0.189103	0.409546	0.229068	1.27031	0.449327
Popcorn (P)	Severe (%30)	1	42.9222	50.9985	28.5508	1134.36	6.88825	74.2509	17.6394	49.412	0.35595	0.664484	0.52107	3.88852	1.36212
Popcorn (P)	Severe (%30)	2	52.8416	41.6156	27.0383	1098.23	0.929562	79.0026	16.2563	53.4611	0.293022	0.632654	0.546495	2.91005	1.50016
Popcorn (P)	Severe (%30)	3	54.191	40.6926	26.4477	1063.3	2.99694	77.354	20.7539	48.8976	0.30494	0.586729	0.61191	0.79686	0.213943
Sugar maize (S)	Control (%80)	1	99.1808	0.674157	13.9555	1854.17	2.49414	79.1317	9.66312	32.2839	0.107865	0.575991	0.175625	0.859268	0.776938
Sugar maize (S)	Control (%80)	2	94.0551	4.96568	15.9131	1822.31	-2.93848	83.5405	9.94595	34.7081	0.130482	0.452923	0.164834	0.877901	0.781801
Sugar maize (S)	Control (%80)	3	92.3726	6.43483	14.3989	1792.13	0.444344	80.7952	6.3	30.3225	0.114818	0.508252	0.141944	1.32564	1.64633
Sugar maize (S)	Moderate (%50)	1	57.2281	38.1883	11.2283	1606.98	7.56665	75.015	10.948	36.4607	0.134514	0.791294	0.373945	0.933661	0.266136
Sugar maize (S)	Moderate (%50)	2	53.3273	39.7093	12.4977	1559.63	8.10911	74.5748	11.5446	35.2834	0.189258	0.78285	0.400725	1.00669	2.02533
Sugar maize (S)	Moderate (%50)	3	49.4935	45.2255	11.9111	1537.7	0.0485508	81.1164	11.1196	38.463	0.138477	0.839471	0.406368	0.0368792	8.68732
Sugar maize (S)	Severe (%30)	1	29.8573	65.9955	1.68494	1120.44	13.3212	70.3448	11.6008	39.1909	0.496094	1.38418	0.683696	0.026226	27.4231
Sugar maize (S)	Severe (%30)	2	27.9653	66.9357	0.219692	1235.71	30.1951	56.6507	12.7778	41.1229	0.245646	1.21109	0.633659	0.0564878	20.4109
Sugar maize (S)	Severe (%30)	3	29.2857	55.8579	2.7863	1108.2	14.5646	69.3358	11.7264	41.8222	0.204345	1.44071	0.683972	0.116569	8.83306

## Sheet: WB
Band Signal (LUX)
Sample	UBQ11	Sample	HSP70	Sample	HSP90
D%80	892000	D%80	309000	D%80	241000
D%50	1030000	D%50	41100	D%50	124000
D%30	815000	D%30	281000	D%30	182000
P%80	593000	P%80	28900	P%80	103000
P%50	917000	P%50	54500	P%50	64100
P%30	945000	P%30	75200	P%30	27100
S%80	963000	S%80	262000	S%80	105000
S%50	549000	S%50	166000	S%50	135000
S%30	432000	S%30	129000	S%30	27800
Sample	Protein (µg/µl)
D%80	4.2
D%50	4.5
D%30	3.9
P%80	3.9
P%50	3.6
P%30	4.2
S%80	3.6
S%50	3.8
S%30	4.7
