# Supplementary material for: Inter-subspecies diversity of maize to drought stress with physio-biochemical, enzymatic and molecular responses
Source: PeerJ. 2024 Aug 22;12:e17931. doi: 10.7717/peerj.17931 (PMC11345000; doi:10.7717/peerj.17931)
Supplement: Supplemental Information 3 [file peerj-12-17931-s003.xls]

## Sheet: Sheet1
ITEM TO CHECK	IMPORTANCE	CHECKLIST
EXPERIMENTAL DESIGN
Definition of experimental and control groups	E	Line 193-197
Number within each group	E	Line 103
Assay carried out by core lab or investigator's lab?	D	investigator's
Acknowledgement of authors' contributions	D	Both authors
SAMPLE
Description	E	Line 175-177
Volume/mass of sample processed	D	Line 286
Microdissection or macrodissection	E	Macro
Processing procedure	E	Line 286-303
If frozen - how and how quickly?	E	Line 287
If fixed - with what, how quickly?	E
Sample storage conditions and duration (especially for FFPE samples)	E
NUCLEIC ACID EXTRACTION
Procedure and/or instrumentation	E	Line 286-303
Name of kit and details of any modifications	E	Line 286
Source of additional reagents used	D
Details of DNase or RNAse treatment	E	Line 287-294
Contamination assessment (DNA or RNA)	E	Line 293
Nucleic acid quantification	E	Line 287-294
Instrument and method	E	Line 287-295
Purity (A260/A280)	D	Line 289
Yield	D	Line 292
RNA integrity method/instrument	E	Line 287-295
RIN/RQI or Cq of 3' and 5' transcripts	E	Line 297-303
Electrophoresis traces	D
Inhibition testing (Cq dilutions, spike or other)	E	Line 297-303
REVERSE TRANSCRIPTION
Complete reaction conditions	E	Line 292-294
Amount of RNA and reaction volume	E	Line 291
Priming oligonucleotide (if using GSP) and concentration	E	Line 296
Reverse transcriptase and concentration	E	Line 296
Temperature and time	E	Line 297-298
Manufacturer of reagents and catalogue numbers	D	Line 286-303
Cqs with and without RT	D*
Storage conditions of cDNA	D
qPCR OLIGONUCLEOTIDES
Primer sequences	E	Table 1
RTPrimerDB Identification Number	D
Probe sequences	D**
Location and identity of any modifications	E
Manufacturer of oligonucleotides	D
Purification method	D
qPCR PROTOCOL
Complete reaction conditions	E	Line 297-303
Reaction volume and amount of cDNA/DNA	E	Line 296
Primer, (probe), Mg++ and dNTP concentrations	E
Polymerase identity and concentration	E
Buffer/kit identity and manufacturer	E
Exact chemical constitution of the buffer	D
Additives (SYBR Green I, DMSO, etc.)	E	Line 302
Manufacturer of plates/tubes and catalog number	D
Complete thermocycling parameters	E	Line 297-298
Reaction setup (manual/robotic)	D
Manufacturer of qPCR instrument	E	Line 301-303
qPCR VALIDATION
Evidence of optimisation (from gradients)	D
Specificity (gel, sequence, melt, or digest)	E
For SYBR Green I, Cq of the NTC	E
Standard curves with slope and y-intercept	E
PCR efficiency calculated from slope	E
Confidence interval for PCR efficiency or standard error	D
r2 of standard curve	E
Linear dynamic range	E
Cq variation at lower limit	E
Confidence intervals throughout range	D
Evidence for limit of detection	E
If multiplex, efficiency and LOD of each assay.	E
DATA ANALYSIS
qPCR analysis program (source, version)	E	Line 303
Cq method determination	E	Line 303
Outlier identification and disposition	E
Results of NTCs	E
Justification of number and choice of reference genes	E	Line 300
Description of normalisation method	E
Number and concordance of biological replicates	D	Line 304
Number and stage (RT or qPCR) of technical replicates	E
Repeatability (intra-assay variation)	E
Reproducibility (inter-assay variation, %CV)	D
Power analysis	D
Statistical methods for result significance	E	Line 329-333
Software (source, version)	E	Line 329-333
Cq or raw data submission using RDML	D
Table 1. MIQE checklist for authors, reviewers and editors. All essential information (E) must be submitted with the manuscript. Desirable
information (D) should be submitted if available. If using primers obtained from RTPrimerDB, information on qPCR target, oligonucleotides,
protocols and validation is available from that source.
*: Assessing the absence of DNA using a no RT assay is essential when first extracting RNA. Once the sample has been validated as
RDNA-free, inclusion of a no-RT control is desirable, but no longer essential.
**: Disclosure of the probe sequence is highly desirable and strongly encouraged. However, since not all commercial pre-designed assay
vendors provide this information, it cannot be an essential requirement. Use of such assays is advised against.
